# Supplementary material
Source: Research Square preprint supplement (doi:10.21203/rs.3.rs-9296307/v1)
Supplement: Supplementary file 1 [file 2682804662f31e73f948aab2.docx]

**SUPPLEMENTARY MATERIAL**

**Construction Waste Management and Circular Economy in Urban Infrastructure: A Systematic Literature Review and Strategic Roadmap for Developing Economies**

M. Pires a*, K. Lafayette b, E. K. Rabbani c, M. E. de Melo d, R. Claus e, D. Viegas f, M. Sandes g

a *University of Pernambuco (UPE), Department of Civil Engineering, Recife, Pernambuco, Brazil. E-mail:* [*mftp@poli.br*](mailto:mftp@poli.br)*.*

b*University of Pernambuco (UPE), Department of Civil Engineering, Recife, Pernambuco, Brazil. E-mail:* [*klafayette@poli.br*](mailto:klafayette@poli.br)*.*

c *University of Pernambuco (UPE), Department of Civil Engineering, Recife, Pernambuco, Brazil. E-mail:* [*emilia.rabbani@upe.br*](mailto:emilia.rabbani@upe.br)*.*

d*University of Pernambuco (UPE), Department of Civil Engineering, Recife, Pernambuco, Brazil. E-mail:* [*mesm@poli.br*](mailto:mesm@poli.br)*.*

e *Aena Brazil, Engineering and Construction Manager. São Paulo, Brazil. E-mail:* [*rclaus@aenabrasil.com.br*](mailto:rclaus@aenabrasil.com.br)*.*

f *University of Pernambuco (UPE), Department of Civil Engineering, Recife, Pernambuco, Brazil. E-mail:* [*djav_pec@poli.br*](mailto:djav_pec@poli.br)*.*

g *University* *of Porto, Department of Civil Engineering, Porto, Portugal. E-mail:* [*up202500468@up.pt*](mailto:up202500468@up.pt)*.*

_____________________

*Corresponding author: e-mail: [mftp@poli.br](mailto:mftp@poli.br). University of Pernambuco, Department of Civil Engineering, Recife, zip code 50720-001, Brazil. Tel: +55 81 3184.7566.

**1. JUSTIFICATIVE**

This supplementary document presents additional tables that complement the results and discussions of the main article. These data include the full list of analyzed publications. These materials provide a comprehensive overview of the bibliometric analysis performed.

**2. COMPLETE DATASET OF ANALYZED PUBLICATIONS**

Table A1 presents the full list of the 50 articles included in the scientometric analysis, selected after applying the inclusion criteria described in the PRISMA methodology. Each record includes information such as title, authors, year of publication, contry, journal, and keywords.

**Table A1** - Articles selected for the scientometric analysis after applying the inclusion criteria.

| **ID** | **Title** | **Years** | **Journal** |
| --- | --- | --- | --- |
| **Authors** | **Country** | **Keywords** |
| 1 | **Pathways to sound management of excavated soil and rock: A case study in Shenzhen** | 2024 | Journal of Cleaner Production |
| Hongzhou Wang; Ning Zhang; Huabo Duan; Liang Dong | China | Excavated soil and rock; Material flow cost accounting; Life cycle thinking; Circular economy; Shenzhen |
| 2 | **Construction and demolition waste best management practice in Europe** | 2018 | Resources, Conservation & Recycling |
| José-Luis Gálvez-Martos; David Styles; Harald Schoenberger; Barbara Zeschmar-Lahl | Espanha | Construction and demolition waste; Circular economy; Recycling; Re-use; Best practices; Environmental management; Waste logistics; Recycled aggregates |
| 3 | **Cost-benefit analysis of demolition waste management via agent-based modelling: A case study in Shenzhen** | 2022 | Waste Management |
| Zhikun Ding; Xiaoyan Cao; Yifei Wang; Huanyu Wu; Jian Zuo; George Zillante | China | Demolition waste management; Agent-based modelling; Selective demolition; Cost-benefit analysis |
| 4 | **Implementation of waste management and minimisation in the construction industry of Malaysia** | 2007 | Resources, Conservation and Recycling |
| Rawshan Ara Begum; Chamhuri Siwar; Joy Jacqueline Pereira; Abdul Hamid Jaafar | Malásia | Waste minimisation; Reduce; Reuse; Recycling; Construction industry; Malaysia |
| 5 | **Recycling and optimum utilization of engineering sediment waste into low-carbon geopolymer paste for sustainable infrastructure** | 2023 | Journal of Cleaner Production |
| Ao Zhou; Kexuan Li; Tiejun Liu; Dujian Zou; Xuan Peng; Hanxiong Lyu; Jindong Xiao; Chenchen Luan | China | Sediment waste; Recycling; Waste management; Carbon emissions; Low-carbon; Geopolymer |
| 6 | **Performance evaluation and classification system of recycled concrete aggregates** | 2025 | Construction and Building Materials |
| Huixia Li; Yan Liang; Yunjie Xia; Hui Du | China | Recycled concrete aggregates; Performance evaluation; Classification system; Pavement engineering; Circular economy |
| 7 | **Analysis of the implementation of effective waste management practices in construction projects and sites** | 2014 | Resources, Conservation and Recycling |
| Marta Gangolells; Miquel Casals; Núria Forcada; Marcel Macarulla | Espanha | Construction and demolition waste; Waste management; Construction companies; Construction sites; Waste management practices; Questionnaire; Spain |
| 8 | **Improving the management of construction waste in Qatar** | 2016 | Proceedings of the Institution of Civil Engineers – Waste and Resource Management |
| James Murray Reid; Khaled El-Gamil Hassan; Mohammed bin Saif Al-Kuwari | Reino Unido | Construction waste; Qatar; recycled aggregates; national policy; landfill reduction |
| 9 | **Cost–benefit analysis of recycled materials in road asphalt layer: a case study in Egypt** | 2025 | Built Environment Project and Asset Management |
| Norhan Sayed; Anwar Badawy; Tarek Attia; Alaa Ahmed | Egito | Recycled materials; RAP; cost-benefit; road construction; Egypt; CIRMR model; sustainability |
| 10 | **Sustainable waste management of construction materials: Mathematical modelling and analysis** | 2025 | Resources, Conservation & Recycling Advances |
| Mayowa Emmanuel Bamisaye; Babatunde Oluwaseun Ajayi; Issara Sereewatthanawut | Tailândia | Environmental impact; System dynamics; Random forest; Recycled concrete aggregate |
| 11 | **Barriers to circular economy practices during construction and demolition waste management in an emerging economy** | 2023 | Resources, Conservation & Recycling Advances |
| Vandana Bhavsar; Srividhya Raju Sridharan; J.S. Sudarsan | Índia | Circular economy; Construction industry; Construction demolition and waste; Emerging economies; Reuse and recycle |
| 12 | **In support of circular economy to evaluate the effects of policies of construction and demolition waste management in three key cities in Yangtze River Delta** | 2022 | Sustainable Chemistry and Pharmacy |
| Shiwang Yu; Abhishek Kumar Awasthi; Wenting Ma; Mingkang Wen; Luigi Di Sarno; Conghua Wen; Jian Li Hao | China | Construction and demolition waste management; Waste reduction policies; China’s key cities; Yangtze River Delta; Circular economy |
| 13 | **Awareness, perceived importance, and implementation of circular economy principles: Insights from Turkish construction sector** | 2025 | Journal of Environmental Management |
| Burcu Salgin; Recep Ulucak; Atacan Akgün; Bülent Akdemir; Kofi Agyekum; Judith Amudjie | Turquia | Circular economy; Sustainable building practices; Turkish construction sector; Construction and demolition waste; Policy framework |
| 14 | **Smart mapping of recyclable construction materials using UAV remote sensing and optimised YOLOv8 deep learning within a GIS framework** | 2025 | Microchemical Journal |
| Taoyue Wang | Reino Unido | Construction waste management; UAV remote sensing; Deep learning; Object detection; Recyclable materials; GIS; Sustainable construction; Circular economy |
| 15 | **Experimental study on preparation of solidified soil from residue of construction waste** | 2024 | Construction and Building Materials |
| Jian Liu; Bicen Zhao; Shixuan Zhang; Lingyi Wu; Cheng Wang; Zhu Ding; Benchi Che; Xianfeng Wang | China | Construction waste; Residue; Soil stabilizer; Solidified soil; China |
| 16 | **Investigating the environmental and mechanical properties of sustainable asphalt mastic solutions for road flexible pavements** | 2023 | Transportation Research Procedia |
| Rosa Veropalumbo; Cristina Oreto; Nunzio Viscione; Francesca Russo | Itália | Asphalt pavements; LCA; rheology; bitumen |
| 17 | **Strategies for minimizing construction and demolition wastes in Malaysia** | 2017 | Resources, Conservation & Recycling |
| Mohd Reza Esa; Anthony Halog; Lucia Rigamonti | Austrália | C&D waste; Waste management; Questionnaire; CLD; Systems thinking; Malaysia |
| 18 | **Characterization and performance evaluation of asphalt mastics modified with recycled concrete powder** | 2025 | Construction and Building Materials |
| Huixia Li; Yan Liang; Yanke Yang; Yunjie Xia; Xiangbing Xie; Zhengtao He | China | Recycled Concrete Powder (RCP); Asphalt mastics; Performance evaluation; Microstructural characteristics; Interaction mechanisms; Filler substitution |
| 19 | **Factors driving waste sorting in construction projects in China** | 2022 | Journal of Cleaner Production |
| Jingkuang Liu; Yixuan Chen; Xuetong Wang | China | Construction waste; Sorting; Driving factors; Structural equation; Knowledge gap |
| 20 | **Mechanistic and environmental benefits of accelerated carbonation in low-cement recycled concrete powder aggregates for sustainable asphalt pavements** | 2025 | Construction and Building Materials |
| Kui Hu; Guoqing Zhao; Yajun Lv; Jia Li; Jiahao Zhang; Pizhong Qiao; Hairong Huang; Tianlin Duo | China | Recycled concrete powder; Accelerated carbonation curing; Artificial aggregates engineering; Asphalt-aggregate interface; Sustainable pavement materials |
| 21 | **Fluoride leaching from tuff breccia and its removal by natural and commercial adsorbents** | 2024 | Chemosphere |
| Takahiko Arima; Nohara Yokobori; Walubita Mufalo; Keita Nakajima; Carlito Baltazar Tabelin; Toshifumi Igarashi | Japan | Fluoride; Adsorbent; Amorphous aluminum and iron; Adsorption isotherm; Magnesium oxide |
| 22 | **Water sludge reuse as a geotechnical component in road construction: Experimental study** | 2022 | Cleaner Engineering and Technology |
| Fabiana Alves Fiore; Suzelei Rodgher; Cristiane Yumi Koga Ito; Vivian Silveira dos Santos Bardini; Luis Miguel Gutiérrez Klinsky | Brazil | Water treatment sludge; Reuse of sludge; Road construction |
| 23 | **Use of concrete road recycled aggregates for Roller Compacted Concrete** | 2010 | Construction and Building Materials |
| Luc Courard; Frédéric Michel; Pascal Delhez | Belgium | Rigid pavement; Concrete; Compaction; Recycling; Roller Compacted Concrete; Recycled aggregate; Design; Vibration Weighing Test |
| 24 | **The effect of compaction on the leaching and pollutant emission time of recycled aggregates from construction and demolition waste** | 2014 | Journal of Cleaner Production |
| Adela P. Galvín; Jesús Ayuso; Isabel García; José Ramón Jiménez; Francisco Gutiérrez | Spain | Environmental management; Demolition waste; Compaction; Pollutant potential; Leaching behaviour |
| 25 | **Sorting of suitable areas for disposal of construction and demolition waste using GIS and ELECTRE TRI** | 2020 | Waste Management |
| Juliana Biluca; Claudinei Rodrigues de Aguiar; Flavio Trojan | Brazil | Geography information system; Multi-criteria analysis; Aptitude areas map; Construction and demolition waste |
| 26 | **Flexible pavement construction using different waste materials: A review** | 2022 | Materials Today: Proceedings |
| Pradeep Kumar; Shalinee Shukla | India | Pavement; Stabilization; Waste; Sub-base; RAP; Strength |
| 27 | **Stripping and cracking resistance of sustainable warm stone mastic asphalt incorporating construction and demolition waste aggregates with digital image processing** | 2025 | Cleaner Materials |
| Suleiman Abdulrahman; Hamad Al-abdul Wahhab; Waqas Rafiq; Ali Mohammed Babalghaith; Mirza Ghouse Baig; AIB Farouk | Saudi Arabia | Recycled aggregate; Stone mastic asphalt; Moisture damage; Image-based analysis |
| 28 | **Effective utilization and recycling of mixed recycled aggregates for a greener environment** | 2019 | Journal of Cleaner Production |
| L.W. Zhang; A.O. Sojobi; V.K.R. Kodur; K.M. Liew | China | Closed-loop construction and demolition waste management; Economics of recycling; Mixed recycled aggregates; Sustainable construction; Recycled fine and coarse aggregates; Taguchi-RSM optimization |
| 29 | **The strength and environmental performance of asphalt mixtures with recycled concrete aggregates** | 2021 | Transportation Research Part D |
| C.M. Nwakaire; C.C. Onn; S.P. Yap; C.W. Yuen; S. Koting; K.H. Mo; F. Othman | Malaysia | Global warming potential; Tensile strength; Life cycle assessment; Recycled concrete; Aggregate; Resilient modulus; Stability |
| 30 | **Application of demolition wastes mixed with crushed glass and crumb rubber in pavement base/subbase** | 2020 | Resources, Conservation & Recycling |
| Mohammad Saberian; Jie Li; Mahdi Boroujeni; David Law; Chun-Qing Li | Australia | Construction and demolition aggregates; Crushed glass; Crumb rubber; Dynamic properties; Analytical studies |
| 31 | **Stakeholder interactions of government intervention in construction and demolition waste recycling market: A game theory approach** | 2024 | Developments in the Built Environment |
| Yangyue Su; Yabing Xu; Zhikang Bao; S. Thomas Ng; Qun Gao | China | Construction and demolition waste; C&DW recycling; Government intervention; Stakeholder interactions; Game models |
| 32 | **Recycling of construction and demolition waste via a mechanical sorting process** | 2002 | Resources, Conservation and Recycling |
| Wen-Ling Huang; Dung-Hung Lin; Ni-Bin Chang; Kuen-Song Lin | Taiwan | Construction and demolition waste; Sorting; Resource recovery; Cost benefit analysis; Mass balance; Separation; Solid waste management |
| 33 | **Using blends of Construction & Demolition waste materials and recycled clay masonry brick in pavement** | 2016 | Procedia Engineering |
| Ali Arisha; Alaa Gabr; Sherif El-Badawy; Sayed Shwally | Egypt | C&D waste; RCM; Resilient modulus; UGMs; RLTT |
| 34 | **Perspectives on the utilization of reclaimed asphalt pavement in concrete pavement construction: A critical review** | 2023 | Case Studies in Construction Materials |
| Kavitha Karthikeyan; Saravanan Kothandaraman; Goutham Sarang | India | Concrete pavements; Reclaimed asphalt pavement; Sustainable pavement; RAP recycling |
| 35 | **Performance evaluation of pervious concrete pavements with recycled concrete aggregate** | 2022 | Construction and Building Materials |
| Helena Lunkes Strieder; Vanessa Fátima Pasa Dutra; Ângela Gaio Graeff; Washington Peres Núñez; Felipe Raul Meert Merten | Brazil | Pervious concrete; Recycled concrete aggregate; Mechanical properties; Hydraulic properties; Experimental pervious pavement |
| 36 | **Challenges in current construction and demolition waste recycling: A China study** | 2020 | Waste Management |
| Mingxue Ma; Vivian W.Y. Tam; Khoa N. Le; Wengui Li | Australia | Waste management; C&D waste; China case; Site visits; Policy |
| 37 | **Using GIS and optimization to manage construction and demolition waste: The case of abandoned quarries in Lebanon** | 2019 | Waste Management |
| Nadine AlZaghrini; F. Jordan Srour; Issam Srour | Lebanon | Construction and demolition waste; Optimization; GIS; Recycling; Quarries |
| 38 | **Characterization flowchart for assessing the potential reuse of excavation soils in Sao Paulo city** | 2019 | Journal of Cleaner Production |
| Karen Kataguiri; Maria Eugenia G. Boscov; Cláudia E. Teixeira; Sergio C. Angulo | Brazil | Construction and demolition waste; Excavation material; Soil reuse; Earthwork; Geotechnical characterization; Environmental characterization |
| 39 | **Promoting the sustainable development of the recycling market of construction and demolition waste: A stakeholder game perspective** | 2020 | Journal of Cleaner Production |
| Yangyue Su; Hongyun Si; Jianguo Chen; Guangdong Wu | China | Construction and demolition waste; Recycled product; Tripartite evolutionary game; Recycling plant; Sustainability |
| 40 | **Recycled Concrete in Structural Applications for Sustainable Construction Practices in Australia** | 2017 | Procedia Engineering |
| Sepani Senaratne; Gregory Lambrousis; Olivia Mirza; Vivian W. Y. Tam; Won-Hee Kang | Australia | Sustainability; recycled aggregate; natural concrete; construction industry |
| 41 | **Economic viability analysis of a construction and demolition waste recycling plant in Portugal – Part I: Location, materials, technology and economic analysis** | 2013 | Journal of Cleaner Production |
| André Coelho; Jorge de Brito | Portugal | CDW fixed recycling plant; Recycling plant technology; Economic analysis |
| 42 | **Sustainable application of processed TBM excavated rock material as green structural concrete aggregate** | 2021 | Construction and Building Materials |
| Ahmed Alnuaim; Yassir M. Abbas; M. Iqbal Khan | Saudi Arabia | Sustainability; Recycled Aggregate; Concrete; Excavated material handling; Tunnel boring machine; Environment |
| 43 | **Laboratory performance evaluation of porous asphalt mixture containing recycled concrete aggregate and fly ash** | 2024 | Case Studies in Construction Materials |
| Asad Elmagarhe; Qing Lu; Mohammed Alamri; Mohammad Alharthai; Ahmed Elnihum | USA | Recycled concrete aggregate; Fly ash; Porous asphalt mixture; Moisture susceptibility; Mean profile depth; Sound absorption |
| 44 | **Enablers and Policy Framework for Construction Waste Minimization Under Circular Economy: Stakeholder Perspectives** | 2025 | Sustainability |
| Muhammad Usman Shahid; Majid Ali | Pakistan | Waste minimization (WM); circular economy (CE); Saunders’s research onion model; thematic analysis; word frequency; cluster analysis; enablers; policy framework |
| 45 | **Life cycle and performance assessment of recycled aggregates in pavement construction: a cross-sectoral, open-loop approach** | 2025 | Road Materials and Pavement Design |
| Konstantinos Mantalovas; Vineesh Vijayan; Gisella Mammo Zagarella; Francesco Acuto; Alessandro Pisciotta; Laura Inzerillo; Gaetano Di Mino | Italy | Road infrastructure; construction and demolition wastes; circular economy; open loops; life cycle assessment |
| 46 | **Implementation of Malaysian Goverment Initiatives in Managing Construction Waste** | 2016 | Jurnal Teknologi |
| Nurzalikha Sa’adi; Zulhabri Ismail; Maisarah Makmor; Emma Marinie Ahmad Zawawi | Malaysia | Construction waste; waste management; implementation; initiative; policy; guideline; construction industry; Malaysia |
| 47 | **Strategies for construction waste management in Ho Chi Minh City, Vietnam** | 2013 | Built Environment Project and Asset Management |
| Florence Yean Yng Ling; Dinh Song Anh Nguyen | Singapore | Construction waste; Material wastage; Waste management; Vietnam; Barriers; Waste minimization; Waste |
| 48 | **Use of Recycled Construction and Demolition Waste Aggregate for Road Course Surfacing** | 2012 | Journal of Transportation Engineering |
| Rosario Herrador; Pablo Pérez; Laura Garach; Javier Ordóñez | Spain | Aggregate; Recycling; Construction and demolition waste; CDW |
| 49 | **Reducing construction waste: A study of urban infrastructure projects** | 2017 | Waste Management |
| Ruane Fernandes de Magalhães; Ângela de Moura Ferreira Danilevicz; Tarcisio Abreu Saurin | Brazil | Construction waste (CW); Urban infrastructure projects; Waste management; Construction waste minimization; Design stage |
| 50 | **Zero Waste Systems: Barriers and Measures to Recycling of Construction and Demolition Waste** | 2022 | Sustainability |
| Lilliana Abarca-Guerrero; Susi Lobo-Ugalde; Nicole Méndez-Carpio; Rosibel Rodríguez-Leandro; Victoria Rudin-Vega | Costa Rica | Zero waste barriers; construction industry; recycling; measures for valorization of construction waste |
